1 **Muscle weakness precedes atrophy during cancer cachexia and is associated with muscle-**  
2 **specific mitochondrial stress**

3  
4 **Authors:** Luca J. Delfinis<sup>1\*</sup>, Catherine A. Bellissimo<sup>1</sup>, Shivam Gandhi<sup>1</sup>, Sara N. DiBenedetto<sup>1</sup>,  
5 Megan E. Rosa-Caldwell<sup>2</sup>, Fasih A. Rahman<sup>3</sup>, Michael P. Wiggs<sup>4</sup>, Uwe Schlattner<sup>5</sup>, Joe  
6 Quadrilatero<sup>3</sup>, Nicholas P. Greene<sup>2</sup>, and Christopher G.R. Perry<sup>1†</sup>.

7  
8 **Affiliations:**

9 <sup>1</sup>Muscle Health Research Centre, School of Kinesiology, York University, 4700 Keele Street,  
10 Toronto, ON, Canada.

11 <sup>2</sup>Cachexia Research Laboratory, Department of Health, Human Performance and Recreation,  
12 University of Arkansas, Fayetteville, USA.

13 <sup>3</sup>Faculty of Applied Health Sciences, Department of Kinesiology, University of Waterloo,  
14 Waterloo, Ontario, Canada.

15 <sup>4</sup>Mooney Lab for Exercise, Nutrition, and Biochemistry, Department of Health, Human  
16 Performance and Recreation, Baylor University, Waco, TX, USA

17 <sup>5</sup>Laboratory of Fundamental and Applied Bioenergetics (LBFA) and SFR Environmental and  
18 Systems Biology (BEeSy), University of Grenoble Alpes, Grenoble, France.

19  
20 **Email Addresses:**

21 [delfinis@yorku.ca](mailto:delfinis@yorku.ca); [cabellis@yorku.ca](mailto:cabellis@yorku.ca); [shivamg@yorku.ca](mailto:shivamg@yorku.ca); [sdiben@my.yorku.ca](mailto:sdiben@my.yorku.ca);  
22 [merosaca@bidmc.harvard.edu](mailto:merosaca@bidmc.harvard.edu); [fasih.rahman@uwaterloo.ca](mailto:fasih.rahman@uwaterloo.ca); [Michael\\_Wiggs@baylor.edu](mailto:Michael_Wiggs@baylor.edu);  
23 [uwe.schlattner@univ-grenoble-alpes.fr](mailto:uwe.schlattner@univ-grenoble-alpes.fr); [jquadril@uwaterloo.ca](mailto:jquadril@uwaterloo.ca); [npgreene@uark.edu](mailto:npgreene@uark.edu);  
24 [cperry@yorku.ca](mailto:cperry@yorku.ca)

25  
26 **Key Words:** Cancer cachexia, mitochondria, skeletal muscle

27  
28 <sup>†</sup>Address for Correspondence:

29 Christopher Perry, PhD  
30 School of Kinesiology and Health Science  
31 Muscle Health Research Centre

32 344 Norman Bethune College  
33 York University  
34 4700 Keele Street  
35 Toronto, Ontario M3J 1P3  
36 (P) 416 736 2100 ext. 33232  
37 cperry@yorku.ca

38 **Abstract**

39 Muscle weakness and wasting are defining features of cancer-induced cachexia. Mitochondrial  
40 stress occurs before atrophy in certain muscles, but distinct responses between muscles and across  
41 time remains unclear. We aimed to determine the time-dependent and muscle-specific responses  
42 to Colon-26 (C26) cancer-induced cachexia in mice. At 2 weeks post-inoculation, the presence of  
43 small tumours did not alter body or muscle mass but decreased force production in the quadriceps  
44 and diaphragm. Pyruvate-supported mitochondrial respiration was lower in quadriceps while  
45 mitochondrial H<sub>2</sub>O<sub>2</sub> emission was elevated in diaphragm. At 4 weeks, large tumours corresponded  
46 to lower body mass, muscle mass, and cross-sectional area of fibers in quadriceps and diaphragm.  
47 Force production in quadriceps was unchanged but remained lower in diaphragm vs control.  
48 Mitochondrial respiration was increased while H<sub>2</sub>O<sub>2</sub> emission was unchanged in both muscles vs  
49 control. Mitochondrial creatine sensitivity was compromised in quadriceps. These findings  
50 indicate muscle weakness precedes atrophy in quadriceps and diaphragm but is linked to  
51 heterogeneous mitochondrial alterations. Eventual muscle-specific restorations in force and  
52 bioenergetics highlight how the effects of cancer on one muscle do not predict the response in  
53 another muscle. Exploring heterogeneous responses of muscles to cancer may reveal new  
54 mechanisms underlying distinct sensitivities, or resistance, to cancer cachexia.

## 55 **Introduction**

56 Cancer-induced cachexia is a multifactorial syndrome characterized, in part, by a loss of skeletal  
57 muscle mass that cannot be fully reversed by conventional nutritional support (1). This condition  
58 leads to progressive reductions in functional independence and quality of life (2) . Such declines  
59 in muscle mass also reduce tolerance to anticancer therapies and overall survivability (3, 4), and  
60 is associated with increased hospitalization time (5). 20-80% of cancer patients are thought to  
61 develop cachexia depending on the type and stage of cancer (6). However, the time-dependent  
62 relationship between muscle atrophy and weakness remains unclear, as does the degree to which  
63 this relationship may vary between muscle types. Exploring the natural divergence of muscle  
64 responses to cancer may be an opportunistic approach to identify distinct mechanisms underlying  
65 muscle weakness and wasting during cancer cachexia.

66

67 Contemporary theories posit that muscle wasting during cachexia is induced by circulating factors  
68 generated during cancer which trigger protein degradation and loss of myofibrillar proteins  
69 through various mechanisms (4, 7, 8). However, recent literature suggests skeletal muscle  
70 mitochondria are also subject to damage during cancer cachexia (9–11) and may be direct  
71 contributors to either muscle weakness or atrophy. Current literature suggests oxidative  
72 phosphorylation is impaired in the soleus, gastrocnemius and plantaris muscle of tumour-bearing  
73 mice, while reactive oxygen species (ROS) - in the form of mitochondrial H<sub>2</sub>O<sub>2</sub> emission (mH<sub>2</sub>O<sub>2</sub>)  
74 - can be increased or decreased depending on the muscle and duration of cancer (9, 11, 12). This  
75 suggests cellular mechanisms contributing to muscle loss during cancer cachexia may be more  
76 complicated than previously believed. Moreover, in the Lewis lung carcinoma (LLC) xenograft  
77 mouse model, certain indices of skeletal muscle mitochondrial dysfunction preceded the onset of  
78 muscle atrophy, suggesting mitochondria may be a potential therapeutic target (12). This theory  
79 was supported by subsequent studies reporting positive effects of the mitochondria-targeting  
80 compound SS-31 in preventing certain indices of cachexia in some but not all muscles of the C26  
81 xenograft mouse model (13, 14). However, given the multifactorial contributions to cachexia  
82 during cancer, it seems likely the relationship between mitochondria and myopathy may differ  
83 between muscle type and throughout cancer progression.

84

85 Indeed, skeletal muscle mitochondria are known to be highly adaptable to metabolic stressors and  
86 can super-compensate during an energy crisis (15, 16). In this light, the available literature does  
87 not provide sufficient information to predict the extent to which cancer will affect individual  
88 muscles, particularly in relation to their underlying mitochondrial responses to the systemic stress  
89 of this disease. Understanding the time-dependent nature of unique mitochondrial signatures  
90 during cancer-induced cachexia might better inform the development of mitochondrial therapies  
91 that have so far yielded disparate results across various muscle types in the C26 cancer mouse  
92 model (13, 14).

93  
94 In this study, we compared the time-dependent relationship of muscle dysfunction and  
95 mitochondrial bioenergetic responses to cancer between locomotor (quadriceps) and respiratory  
96 muscles (diaphragm). In so doing, we employed a careful consideration of mitochondrial substrate  
97 titration protocols modeling key parameters governing mitochondrial bioenergetics *in vivo*.  
98 Similar assay design considerations have been essential for identifying precise mitochondrial  
99 bioenergetic contributions to cellular function in our previous research (17–20). Using the C26  
100 tumour-bearing mouse model, we reveal muscle weakness precedes atrophy in quadriceps and  
101 diaphragm. Energetic insufficiencies were more pronounced in quadriceps whereas mitochondrial  
102 redox stress was more evident in diaphragm, yet both muscles showed a delayed correction, if not  
103 super-compensation, as cancer progressed. These findings demonstrate the effects of cancer on  
104 one muscle do not necessarily predict the response in another muscle type. Moreover, the  
105 heterogeneous muscle-specific and time-dependent mitochondrial relationships to cancer may  
106 represent an opportunity for informing a more targeted approach to developing mitochondrial  
107 therapies to improve muscle health in this debilitating disorder.

## 108 **Results**

### 109 **C26 tumour-bearing mice show progressive reductions in body weight and muscle mass**

110 Body weights were reduced 4 weeks after subcutaneous implantations of C26 cells (Figure 1A),  
111 while tumour-free body weights progressively decreased beginning at 3 weeks to a net loss of 27%  
112 by 4 weeks (Figure 1B, C) at a time of substantial tumour growth (Figure 1D). Tumours grew to  
113 ~0.2g at 2 weeks and ~2.2g at 4 weeks (Figure 1E). C26 spleen mass (marker of inflammatory  
114 stress) was not different from PBS at 2 weeks but was significantly greater at 4 weeks (Figure 1F).  
115 The mass of specific muscles was similar between C26 and PBS at 2 weeks (Figure 1G). At 4  
116 weeks soleus (SOL) mass was similar between C26 and PBS while lower muscle masses were  
117 observed in C26 for extensor digitorum longus (EDL; -23%), plantaris (PLA; -20%), tibialis  
118 anterior (TA; -26%), gastrocnemius (GA; -21%) and quadriceps (QUAD; -29%) vs PBS (Figure  
119 1H).

120

### 121 **Force production is reduced prior to atrophy in quadriceps and diaphragm but eventually** 122 **returns to normal in quadriceps**

123 At 2 weeks, C26 muscle force was lower in quadriceps (Figure 2A) and diaphragm (Figure 2B)  
124 relative to PBS as a group main effect. In the quadriceps, there was an interaction whereby C26 at  
125 2 weeks produced less force at 80Hz, 100Hz and 120Hz compared to both PBS groups and the  
126 C26 at 4 weeks (not shown). By 4 weeks, quadriceps force in C26 was not different compared to  
127 PBS (Figure 2A). In contrast, diaphragm force remained lower relative to PBS control mice at 4  
128 weeks (Figure 2B).

129

130 In both quadriceps and diaphragm, fibre CSA was similar between C26 and PBS groups for  
131 specific MHC isoforms (Figure 3A-D) and when pooling all MHC isoforms (data not shown) at 2  
132 weeks. However, at 4 weeks, quadriceps muscle exhibited lower CSA in pooled fibres (-40%,  
133  $p < 0.05$ , data not shown) with specific reductions in MHC IIX (-32%) and MHC IIB (-49%) but  
134 not the MHC IIA isoform (Figure 3E, F) vs PBS. MHC I-positive fibres were not detected in the  
135 quadriceps (Figure 3B, F). At 4 weeks, diaphragm muscle also showed lower CSA in pooled fibres  
136 (-31%,  $p < 0.05$ , data not shown) which mirrored changes in MHC I (-28%), MHC IIA (-21%),  
137 MHC IIB (-30%) and MHC IIX (-35%) vs PBS at 4 weeks (Figure 3G, H).

138

139 **Mitochondrial electron transport chain protein contents are reduced in quadriceps but do**  
140 **not change in diaphragm by 4 weeks of tumour development**

141 At 2 weeks, electron transport chain (ETC) subunit contents in both muscles were unchanged in  
142 C26 relative to PBS controls (Figure 4A, B). At 4 weeks, C26 showed lower contents in subunits  
143 of complex I (-31%), complex II (-18%), complex IV (-37%), complex V (-11%) and total ETC  
144 subunit content (-22%; Figure 4C) relative to PBS that were significant or approached significance.  
145 ETC subunit contents did not change in diaphragm at 4 weeks relative to PBS (Figure 4D).

146

147 **Mitochondrial respiratory control by ADP is greater in both muscles by 4 weeks of tumour**  
148 **development despite early reductions in the quadriceps**

149 We determined if the central role of ADP in stimulating respiration was impaired in both  
150 quadriceps and diaphragm at 2 and 4 weeks after subcutaneous implantations of C26 cancer cells.  
151 We stimulated complex I with NADH generated by pyruvate (5mM) and malate (2mM) across a  
152 range of ADP concentrations to challenge mitochondria with a spectrum of metabolic demands.  
153 The ADP titrations were repeated with (+Creatine) and without (-Creatine) 20mM creatine to  
154 model the two main theoretical mechanisms of energy transfer from mitochondria to cytosolic  
155 compartments that utilize or bypass mitochondrial creatine kinase (mtCK) respectively (Figure 5).  
156 Briefly, the +Creatine system stimulates mitochondria to export phosphocreatine (PCr) whereas  
157 the -Creatine condition drives ATP export.

158

159 In both the -Creatine and +Creatine conditions, pyruvate/malate-supported ADP-stimulated  
160 respiration normalized per mass of fibre bundles (not corrected for ETC subunit content) was lower  
161 2 weeks after C26 implantations in the quadriceps compared to PBS with a main effect across all  
162 ADP concentrations with or without creatine (Figure 6A, B). The general reduction in respiration  
163 for C26 normalized per mass of fibre bundle was also seen when data were normalized to ETC  
164 subunit content (Figure 6C, D). This suggests respiratory control was reduced within mitochondria  
165 due to an inherent property of the ETC not related to ETC abundance. We also evaluated if creatine  
166 sensitivity was altered in the C26 tumour-bearing muscle by calculating the +Creatine/-Creatine  
167 respiratory ratio. This creatine sensitivity index is a measure of the ability of creatine to stimulate  
168 respiration by accelerating matrix ADP/ATP cycling and represents coupling of the creatine kinase  
169 system to ATP generation (Figure 5), particularly at sub-maximal ADP concentrations (21, 22)

170 which we have reported previously (17, 18). In quadriceps, creatine sensitivities at 100 $\mu$ M and  
171 500 $\mu$ M ADP were unchanged at 2 weeks in C26 vs PBS at this time point (Figure 6E, F).  
172 Collectively, these findings indicate respiration was reduced to similar extents in both -Creatine  
173 and +Creatine conditions of energy exchange between mitochondria and cytoplasmic  
174 compartments.

175

176 These early decrements in quadriceps respiration in C26 at 2 weeks were reversed by 4 weeks.  
177 This apparent compensation was seen in both -Creatine and +Creatine conditions. Specifically,  
178 respiration was similar to PBS control mice at 4 weeks when normalized per mass of fibre bundle  
179 (Figure 6G, H) and higher than controls when normalized to ETC subunit protein content (Figure  
180 6I, J) despite reductions in ETC content as described above (Figure 4C). These findings suggest  
181 mitochondria in quadriceps are highly plastic and can super-compensate by upregulating their  
182 responsiveness to ADP to levels exceeding PBS controls. Additionally, at 4 weeks, quadriceps  
183 mitochondrial creatine sensitivity was impaired in C26 relative to PBS when considering  
184 respiration normalized to ETC subunit content given the ratio did not exceed a value of 1.0 which  
185 indicates that creatine could not stimulate respiration above the level elicited by ADP alone (Figure  
186 6L). Thus, while C26 cancer strongly increased ADP-stimulated respiration by 4 weeks (Figure  
187 6I), it compromised the coupling of creatine kinase energy transfer, suggesting that this system did  
188 not contribute to restored force at this time point (Figure 2A).

189

190 In the diaphragm, respiration was similar between C26 and PBS at 2 weeks (Figure 7A-F) but was  
191 greater in C26 vs PBS at 4 weeks in both the -Creatine and +Creatine conditions (Figure 7G-J).  
192 This upregulation by 4 weeks occurred despite no changes in ETC subunit content as noted above  
193 (Figure 4D) which suggests mitochondria increase their responsiveness to ADP through  
194 mechanisms that may be independent of mitochondrial content. No changes in creatine sensitivity  
195 were observed in C26 vs PBS at 4 weeks (Figure 7K, L) suggesting that coupling of creatine kinase  
196 to ATP generation was maintained, in contrast to impaired creatine sensitivity seen in the  
197 quadriceps as noted above. Lastly, there was a significant interaction whereby respiration was  
198 greater in C26 vs PBS at 5000 $\mu$ M and 7000 $\mu$ M ADP when normalized per mass of fibre bundles  
199 (Figure 7G, H) and at all ADP concentrations except 25 $\mu$ M and 100 $\mu$ M when normalized to total  
200 ETC subunit content (Figure 7I, J).



201

202 These alterations were specific to pyruvate/malate-supported ADP-stimulated respiration as there  
203 were no changes in respiration in response to glutamate (further NADH-generation) and succinate  
204 (FADH<sub>2</sub>) generation when comparing C26 to PBS at either time point (Figure S1, S2). By 2 weeks  
205 of C26, diaphragm showed a decrease in State II respiration (no ADP, supported by  
206 pyruvate/malate; Figure S1, S2) which is generally used as a marker of respiration driven by proton  
207 leak into the matrix from the inner membrane space through various sites that are not coupled to  
208 ATP synthesis (23). However, State II respiration was greater than control by 4 weeks in both  
209 muscles suggesting greater uncoupling at occurs as cancer progresses (Figure S2). Lastly, changes  
210 in respiration noted above did not result in changes to the phosphorylation of AMPK in C26  
211 relative to PBS at either 2- or 4-week timepoints (Figure 8); albeit increases in AMPK and the p-  
212 AMPK/AMPK ratio were trending in the C26 (4wk) group in the quadriceps.

213

214 **H<sub>2</sub>O<sub>2</sub> emission is increased in diaphragm early during tumour development and restored to**  
215 **normal by 4 weeks but is unaffected in quadriceps**

216 We stimulated complex I with pyruvate (10mM) and malate (2mM) to generate NADH in the  
217 absence of ADP to elicit mH<sub>2</sub>O<sub>2</sub> emission and determined ADP's ability to attenuate this emission  
218 as occurs naturally during oxidative phosphorylation (see schematic representation, Figure 5). At  
219 2 weeks following C26 implantations, quadriceps mH<sub>2</sub>O<sub>2</sub> emission was similar to PBS controls  
220 under maximal emission conditions (no suppression by ADP, State II; Figure 9A, C) and during  
221 suppression by ADP (Figure 9B, D). By 4 weeks of C26 growth, quadriceps mH<sub>2</sub>O<sub>2</sub> was lower  
222 than PBS in both maximal and ADP-suppressive states (Figure 9E, F). However, when mH<sub>2</sub>O<sub>2</sub>  
223 was normalized to total ETC subunit content, no differences were observed between C26 and PBS  
224 (Figure 9G, H). This finding suggests eventual decreases in quadriceps mH<sub>2</sub>O<sub>2</sub> by 4 weeks were  
225 related to decreased ETC subunit content as shown in Figure 4. Due to limited tissue availability,  
226 pyruvate-supported mH<sub>2</sub>O<sub>2</sub> was assessed only in the +Creatine condition.

227

228 In contrast to the lower mH<sub>2</sub>O<sub>2</sub> in quadriceps, diaphragm mH<sub>2</sub>O<sub>2</sub> was greater in C26 mice at 2  
229 weeks relative to PBS in the presence of ADP despite no change in maximal mH<sub>2</sub>O<sub>2</sub> (Figure 9I,  
230 J). This finding reveals C26 causes early elevations in diaphragm mH<sub>2</sub>O<sub>2</sub> that are likely due to a  
231 specific impairment in the ability of ADP to attenuate H<sub>2</sub>O<sub>2</sub> emission. Moreover, when mH<sub>2</sub>O<sub>2</sub>

232 emission was normalized to total ETC subunit content at 2 weeks, maximal  $\text{mH}_2\text{O}_2$  emission  
233 remained unchanged (Figure 9K), while the higher emissions in the presence of ADP did not reach  
234 significance (Figure 9L) but mirrored patterns observed when normalized to wet mass of tissue as  
235 noted above. At 4 weeks, there were no differences in diaphragm  $\text{mH}_2\text{O}_2$  under maximal or  
236 submaximal (presence of ADP) conditions using either normalization approach (Figure 9M-P)  
237 suggesting diaphragm mitochondria are plastic and can eventually restore  $\text{mH}_2\text{O}_2$  to normal levels.  
238  
239 Succinate-supported  $\text{mH}_2\text{O}_2$  emission generally did not change in either muscle in C26 vs PBS at  
240 either time point (Figure S3). This finding suggests reverse electron flux to Complex I from  
241 Complex II (23) was not altered by C26 cancer, and the responses mentioned above using  
242 pyruvate/malate reveal a specific alteration in  $\text{mH}_2\text{O}_2$  emission supported by forward electron flux  
243 through Complex I.

244 **Discussion**

245 Certain indices of skeletal muscle mitochondrial dysfunction have been associated with cancer  
246 cachexia in various mouse models (11–13, 24, 25), but the time- and muscle-dependent  
247 relationship remains unclear. Here, we demonstrate how quadriceps and diaphragm have both  
248 shared and distinct time-dependent responses to cancer in the C26 colon carcinoma mouse model  
249 of cancer cachexia. First, weakness was observed prior to atrophy in both muscles, yet an eventual  
250 increase in force production to control levels occurred only in quadriceps. Second, atrophy in most  
251 fibre types was preceded by altered mitochondrial bioenergetics but the specific relationship  
252 differed between muscles with decreases in respiration occurring in quadriceps in contrast to  
253 elevated  $mH_2O_2$  emission in diaphragm. Third, both muscles upregulated mitochondrial  
254 respiration supported specifically by pyruvate and malate substrates at 4 weeks which may reflect  
255 a hormetic adaptation to maintain energy homeostasis during cachexia. Likewise, the diaphragm  
256 restored Complex I-supported mitochondrial  $H_2O_2$  emission to normal lower levels by 4 weeks  
257 which demonstrates the transient nature of this potential redox pressure.

258  
259 Collectively, these findings suggest muscle weakness can occur before atrophy during C26 cancer,  
260 and this progression is related to dynamic time-dependent changes in mitochondrial bioenergetics  
261 that are unique to each muscle.

262  
263 **Mitochondrial bioenergetic alterations and skeletal muscle force reductions precede**  
264 **skeletal muscle atrophy**

265 Work from *Brown* et al. suggested mitochondrial degradation and dysfunction precedes muscle  
266 atrophy in the LLC xenograft mouse model of cancer cachexia (12). In this study, atrophy markers  
267 occurred after earlier indices of mitochondrial degeneration in comparator muscles (flexor  
268 digitorum brevis and plantaris) including mitochondrial degradation, respiratory control ratios and  
269  $H_2O_2$  emission. The findings of the present study support this proposal with a comparison of  
270 atrophy, mitochondrial respiration and  $mH_2O_2$  emission within the same muscle types, namely  
271 quadriceps and diaphragm. These findings also extend the proposal by showing muscle-specific  
272 mitochondrial alterations occur concurrent to muscle weakness and before atrophy. Specifically,  
273 early decreases in respiratory kinetics in quadriceps were not seen in diaphragm suggesting that  
274 more oxidative muscle might avoid such respiratory decrements. Conversely, early increases in

275 mH<sub>2</sub>O<sub>2</sub> emission seen in diaphragm did not occur in quadriceps. These relationships suggest  
276 targeted therapies to counter mitochondrial alterations during cancer cachexia should consider the  
277 specific bioenergetic function that is altered at precise timepoints in each muscle type.

278  
279 This relationship between early mitochondrial stress prior to atrophy in both muscles becomes  
280 further complex when considering force production. Muscle weakness occurred at 2 weeks in both  
281 muscles before atrophy which highlights a shared pattern in the progression of muscle dysfunction  
282 during cancer. While the purpose of this investigation was not to address other mechanisms  
283 regulating force production, reduced fibre sizes cannot be an explanation given atrophy did not  
284 occur until after weakness was first observed. However, the distinct mitochondrial signatures in  
285 both muscles at 2 weeks could guide additional questions. For example, in the quadriceps, the early  
286 reductions in force were associated with early decreases in mitochondrial respiratory control by  
287 ADP. When force production was restored to control levels by 4 weeks, respiration actually  
288 increased above control levels when normalized to ETC subunit content. This dynamic relationship  
289 is intriguing and suggests early quadriceps weakness might be due to impairments in mitochondrial  
290 energy provision that is nonetheless plastic and capable of adapting – possibly as a hormetic  
291 response to the earlier respiratory deficiency – to correct this weakness through super-  
292 compensations in energy supply.

293  
294 In contrast, the diaphragm weakness seen at 2 weeks might be linked to an early redox pressure  
295 given elevated mH<sub>2</sub>O<sub>2</sub> emission was observed. This observation is consistent with prior  
296 observations of early and transient increases in H<sub>2</sub>O<sub>2</sub> emission in diaphragm in the LLC mouse  
297 model of cancer cachexia (24). However, while we did not observe lower respiration in the  
298 diaphragm, the increased respiration seen at 4 weeks in this muscle is surprising. The explanation  
299 for this increase is not apparent but might suggest an earlier energetic deficiency occurred outside  
300 of our selected time points, but this is speculative and would require additional examination.

301  
302 Overall, while the precise mechanism of lower muscle force is not apparent at 2 weeks in both  
303 muscles, the possible contributions of mitochondria could be related more to an early energy crisis  
304 in quadriceps vs a redox stress in diaphragm that, as noted above, also preceded the eventual  
305 atrophy of each muscle (Figure 10). Additional insight could be gained by extending the current

306 investigation's focus on fibre type-specific cross sectional area responses to cancer by comparing  
307 a wider spectrum of fibre types with regards to mitochondria-atrophy relationships.

308

### 309 **Perspectives on the potential for mitochondrial hormesis in quadriceps and diaphragm**

310 The findings of lower respiration and increased  $mH_2O_2$  emission at 2 weeks is consistent with prior  
311 reports at various time points and muscle in the LLC, C26 and peritoneal carcinosis mouse models  
312 (11–13, 24, 25). To our knowledge, the eventual increase in pyruvate-supported respiration seen  
313 in both quadriceps and diaphragm in the present study is novel, while, the attenuation of  $mH_2O_2$   
314 emission seen in the diaphragm is consistent with past reports in the plantaris (12) and diaphragm  
315 (24) in the LLC mouse model of cachexia. As noted above, mitochondrial respiratory control by  
316 ADP increased above control in both muscles despite a stress being observed earlier only in  
317 quadriceps. We questioned whether this early reduction in respiration represented an energy crisis  
318 triggering compensatory signaling through the energy sensor AMPK – a pathway that triggers  
319 compensatory mitochondrial biogenesis or upregulation of substrate-specific oxidation (26). We  
320 did not observe an effect of cancer on AMPK phosphorylation at either time point (Figure 8),  
321 although there was a trend in the quadriceps at 4 weeks of tumour bearing whereby AMPK content  
322 was increased. Nonetheless, these results do not rule out the potential for AMPK activation at other  
323 time points. There are also multiple feedback control systems linking metabolic stress to  
324 respiratory control that are independent of AMPK which might be considered in future  
325 investigations (27).

326

327 The design of substrate titration protocols lends insight into the specific mechanisms by which  
328 respiration and  $mH_2O_2$  become altered during cancer. For example, as pyruvate/malate was used  
329 as the substrates to generate NADH to stimulate complex I-supported respiration, future  
330 investigations might consider the potential for cancer to upregulate pyruvate dehydrogenase  
331 activity, albeit maximal activity given saturating pyruvate concentrations were used. Also, the  
332 consistent increase in respiration across a wide spectrum of ADP concentrations by 4 weeks in  
333 both muscles suggests mitochondrial responsiveness to a wide range of metabolic demands may  
334 have been enhanced such that key regulators of matrix ADP/ATP cycling could be considered for  
335 future directions (Figure 5). ADP was also more effective at attenuating  $mH_2O_2$  (23) in quadriceps  
336 by 4 weeks (Figure 9) which supports this possibility. Collectively, these findings suggest cancer

337 disrupts mitochondrial bioenergetics by specifically desensitizing mitochondria to ADP in both  
338 muscles.

339

340 Mitochondrial creatine metabolism appeared to be less capable of adapting in quadriceps by 4  
341 weeks (Figure 6L) suggesting mitochondrial creatine kinase-dependent phosphate shuttling is  
342 more affected in this muscle than diaphragm which showed no such deficiency. In fact, the  
343 creatine-independent (-Creatine) system showed homogeneous plasticity by upregulating in both  
344 muscles by 4 weeks while the creatine-dependent system upregulated only in the diaphragm. These  
345 findings suggest mitochondrial creatine metabolism may be disrupted in quadriceps muscle during  
346 cancer which may impact energy homeostasis given the importance of this system in certain  
347 muscles (21).

348

349 In general, the diaphragm appeared to be superior to quadriceps with respect to maintaining  
350 mitochondrial ETC content markers and respiratory control by ADP at 2 weeks with evidence of  
351 super-compensation in respiratory function at 4 weeks. Furthermore, reductions in ETC protein  
352 contents were observed in quadriceps at 4 weeks after C26 implantation whereas no changes were  
353 observed in diaphragm. This resilience of diaphragm appears to be a unique finding given prior  
354 reports have also shown lower mitochondrial protein markers from various pathways and muscle  
355 types in LLC and *APC*<sup>(Min/+)</sup> mouse models of cancer cachexia (10). While the mechanisms for this  
356 muscle heterogeneity remain unclear, one possibility relates to muscle contractile activity.  
357 Diaphragm constantly contracts *in vivo* whereas quadriceps is used only during locomotion. As  
358 mitochondrial content and substrate oxidation are regulated by contractile activity (27), future  
359 directions might consider whether the diaphragm holds a special mitochondrial ‘resistance’ to  
360 cancer with respect to energy homeostasis which might support the growing notion of chronic  
361 contractile activity in improving muscle health during cancer (28).

362

363 In conclusion, this investigation reports muscle weakness precedes atrophy of quadriceps and  
364 diaphragm in the C26 colon carcinoma mouse model of cancer cachexia. This progression was  
365 associated with heterogenous muscle-specific and time-dependent mitochondrial responses in both  
366 muscles. Specifically, an early energetic stress (impaired respiratory control by ADP) was more  
367 apparent in quadriceps in contrast to a mitochondrial redox pressure in diaphragm. These early

368 mitochondrial stressors were seemingly corrected as cancer progressed despite the development  
369 of atrophy in both muscles and a unique increase in force production in quadriceps. Moreover,  
370 C26 cancer caused a unique impairment in the coupling of the mitochondrial creatine kinase  
371 system to ATP generation in quadriceps whereas this system was not affected in diaphragm. This  
372 dynamic plasticity across time demonstrates how the effects of cancer on one muscle may not  
373 predict the response in another muscle type. The findings also highlight how understanding  
374 heterogeneity may identify mechanisms that determine whether a given muscle might be sensitive,  
375 or resistant, to cancer cachexia.

376

377

## 378 **Methods**

### 379 **Animal Care**

380 48 eight-week-old male CD2F1 mice were purchased from Charles River (Massachusetts, USA).  
381 Upon arrival, mice were housed and given a minimum of 72 h to acclimatize before cancer  
382 implantations. All mice were provided access to standard chow and water ad libitum as differences  
383 in food intake has been shown to not impact the C26 model of cancer cachexia (29). Mice were  
384 monitored daily for general well-being, tumour ulcerations and tumour size. If mice demonstrated  
385 signs of extreme distress, mice would be sacrificed as soon as possible, however, this was never  
386 required.

387

### 388 **C26 Cell Culture and Tumour Implantation**

389 C26 cancer cells (Purchased from NCI – Frederick, MD USA) were plated at passage 2-3 in T-75  
390 flasks in DMEM supplemented with 10% foetal bovine serum plus 1% penicillin and streptomycin.  
391 Once confluent, cells were trypsinized, counted and diluted in PBS. C26 cells ( $5 \times 10^5$ ) suspended  
392 in 100  $\mu$ L sterile PBS were implanted subcutaneously to both flanks of mice at 8 weeks of age  
393 (11). For control, mice received identical subcutaneous injections of 100  $\mu$ L sterile PBS and aged  
394 for 2 weeks (**PBS (2wk); n= 8**) and 4 weeks (PBS (4wk); n= 16). Tumours developed for 14-17  
395 days (C26 (2wk); n= 8) and 26-29 days (C26 (4wk); n= 16). Tumours were measured daily,  
396 recording the length and width of tumours with digital calipers using the following formula to  
397 obtain tumour volume (volume of a sphere):  $(4/3 * \pi * (\text{length}/2) * (\text{width}/2)^2)$  in accordance with  
398 York University Animal Care Committee guidelines. The same investigator was responsible for

399 measuring tumour sizes throughout the length of the study as preliminary work demonstrated that  
400 tumour size measurements can vary between individuals (data not shown; CV – 7.2% between 3  
401 individuals, CV – 1.3 within designated individual).

402

### 403 **Surgery Procedure**

404 Quadriceps, soleus, plantaris, gastrocnemius, tibialis anterior, extensor digitorum longus and  
405 spleen were quickly collected under isoflurane anesthesia prior to euthanasia. Tissues were  
406 weighed and snap-frozen in liquid nitrogen and stored at -80°C. Quadriceps and diaphragm  
407 muscles were placed in BIOPS containing (in mM) 50 MES Hydrate, 7.23 K<sub>2</sub>EGTA, 2.77  
408 CaK<sub>2</sub>EGTA, 20 imidazole, 0.5 dithiothreitol, 20 taurine, 5.77 ATP, 15 PCr, and 6.56 MgCl<sub>2</sub>·6 H<sub>2</sub>O  
409 (pH 7.1) to be prepared for mitochondrial bioenergetic assays. Quadriceps from one leg and  
410 diaphragm strips were harvested for mitochondrial bioenergetic assays while the quadriceps from  
411 the contracted leg and a separate diaphragm strip were used for force measurements. The  
412 diaphragm strip used for force measurements was cut within 30 seconds of the entire diaphragm  
413 being placed in BIOPS prior to transferring the strip to Ringer's solution as noted below.

414

### 415 ***In Situ* Quadriceps Force and *In Vitro* Diaphragm Force**

416 *In situ* force production for quadriceps muscle was partially adapted from previous literature (30).  
417 Mice were anesthetized with isoflurane and shaved of all hair on their hindlimb. An incision was  
418 made above the patella to expose the femoral tendon which was then tightly secured with suture.  
419 Once the knot was in place, the tendon was carefully severed, and the suture was attached to an  
420 Aurora Scientific 305C muscle lever arm with a hook (Aurora, Ontario, Canada). The knee was  
421 secured with a vertical knee clamp immobilizing the knee joint with a 27G needle. Contraction of  
422 the quadriceps was controlled through percutaneous stimulation of the femoral nerve anterior to  
423 the hip joint. Optimal resting length ( $L_o$ ) was determined using single twitches (pulse width =  
424 0.2ms) at varying muscle lengths. Once  $L_o$  was established, force as a function of stimulation  
425 frequency was measured during 8 isometric contractions at varying stimulation frequencies (1, 20,  
426 40, 60, 80, 100, 120, 140 Hz). The quadriceps muscle was then weighed and used for normalization  
427 of force production.

428



429 *In vitro* force production for diaphragm muscle was partially adapted from previous literature (31).  
430 Briefly, the diaphragm strip used for force production was placed in a petri dish of ~25°C Ringer's  
431 solution containing (in mM): 121 NaCl, 5 KCl, 1.8 CaCl<sub>2</sub>, 0.5 MgCl<sub>2</sub>, 0.4 NaHPO<sub>4</sub>, 24 NaHCO<sub>3</sub>,  
432 5.5 glucose and 0.1 EDTA; pH 7.3 oxygenated with 95% O<sub>2</sub> and 5% CO<sub>2</sub>. Diaphragm strips were  
433 cut from the central region of the lateral costal hemidiaphragm. Silk suture was tied to the central  
434 tendon as well the ribs, and the preparation was transferred to an oxygenated bath filled with  
435 Ringer solution, maintained at 25°C. The suture secured to the central tendon was then attached to  
436 a lever arm while the suture loop secured to the ribs was attached to a force transducer. The  
437 diaphragm strip was situated between flanking platinum electrodes driven by a biphasic stimulator  
438 (Model 305C; Aurora Scientific, Inc., Aurora, ON, Canada). Optimal L<sub>o</sub> was determined using  
439 twitches (pulse width = 0.2ms) at varying muscle lengths. Once L<sub>o</sub> was established, force as a  
440 function of stimulation frequency was measured during 10 isometric contractions at varying  
441 stimulation frequencies (1, 10, 20, 40, 60, 80, 100, 120, 140, 200 Hz). Force production was  
442 normalized to the calculated cross-sectional area (CSA) of the muscle strip (m/l\*d) where m is the  
443 muscle mass, l is the length, and d is mammalian skeletal muscle density (1.06mg.mm<sup>3</sup>).

444

#### 445 **Mitochondrial Bioenergetic Assessments**

446 *Preparation of Permeabilized Muscle Fibres.* The assessment of mitochondrial bioenergetics was  
447 performed as described previously in our publications (17, 19, 32). Briefly, the quadriceps and  
448 diaphragm from the mouse was removed and placed in BIOPS. Muscle was trimmed of connective  
449 tissue and fat and divided into small muscle bundles (~1.2 – 3.7 mg wet weight for quadriceps and  
450 0.6 – 2.1 mg for diaphragm). Each bundle was gently separated along the longitudinal axis to form  
451 bundles that were treated with 40 µg/mL saponin in BIOPS on a rotor for 30 min at 4°C. Following  
452 permeabilization, the permeabilized muscle fibre bundles (PmFB) for respiration assessments  
453 were blotted and weighed in ~ 1.5mL of tared pre-chilled BIOPS (muscle relaxing media) to ensure  
454 PmFB remained relaxed and hydrated rather than exposed to open air. Wet weights were used  
455 given small pieces of muscle can detach during respirometry assessments, albeit greatly reduced  
456 by blebbistatin (described below). Mean ± SEM wet weights (mg) were 2.4 ± 0.07 for quadriceps  
457 and 1.3 ± 0.04 for diaphragm. The remaining PmFB for mH<sub>2</sub>O<sub>2</sub> were not weighed at this step as  
458 this data was normalized to fully recovered dry weights taken after the experiments. All PmFB  
459 were then washed in MiRO5 on a rotator for 15 minutes at 4°C to remove the cytoplasm. MiRO5

460 contained (in mM) 0.5 EGTA, 10 KH<sub>2</sub>PO<sub>4</sub>, 3 MgCl<sub>2</sub>•6H<sub>2</sub>O, 60 K-lactobionate, 20 Hepes, 20  
461 Taurine, 110 sucrose, and 1 mg/ml fatty acid free BSA (pH 7.1).

462  
463 *Mitochondrial Respiration.* High-resolution O<sub>2</sub> consumption measurements were conducted in 2  
464 mL of respiration medium (MiRO5) using the Oroboros Oxygraph-2k (Oroboros Instruments,  
465 Corp., Innsbruck, Austria) with stirring at 750 rpm at 37°C. MiRO5 contained 20 mM Cr to  
466 saturate mitochondrial creatine kinase (mtCK) and promote phosphate shuttling through mtCK or  
467 was kept void of Cr to prevent the activation of mtCK (33) as described in Figure 5. For ADP-  
468 stimulated respiratory kinetics, our previously published procedures to stimulate complexes I and  
469 II-supported respiration were employed (17–19). 5 mM pyruvate and 2 mM malate were added as  
470 complex I-specific substrates (via generation of NADH to saturate electron entry into complex I)  
471 followed by a titration of sub-maximal ADP (25, 100 and 500 μM) and maximal ADP (up to 5000  
472 μM in the presence of Cr or 30000 μM in the absence of Cr). 25 μM and 100 μM are close to low  
473 and high points of previous estimates of free ADP concentrations in human skeletal muscle in  
474 resting and high intensity exercise states and therefore allow the determination of mitochondrial  
475 responsiveness to a physiological spectrum of low to high energy demands (34–38). Saturating  
476 [ADP] were different depending on the muscle and presence or absence of creatine in the  
477 experimental media. Mitochondrial respiration was normalized to mass of fibre bundles as well as  
478 total ETC subunit contents to evaluate whether changes in respiration per mass were due to  
479 alterations in mitochondrial content or intrinsic mitochondrial respiratory responses.

480  
481 Kmapp for creatine to ADP was not established as we have observed that many permeabilized  
482 fibers from past studies do not fit Michaelis-Menten kinetics with these assay conditions (low to  
483 modest R<sup>2</sup>). Creatine accelerates matrix ADP/ATP cycling at submaximal [ADP] and lowers the  
484 Kmapp for ADP in some muscles (21, 33). Therefore, in order to evaluate mitochondrial creatine  
485 sensitivity, 100 and 500 μM ADP were used to calculate a creatine sensitivity index. Following  
486 the ADP titration, cytochrome *c* was added to test for mitochondrial membrane integrity. Finally,  
487 succinate (20 mM) was then added to saturate electron entry into Complex II.

488  
489 All experiments were conducted in the presence of 5 μM blebbistatin (BLEB) in the assay media  
490 to prevent spontaneous contraction of PmFB, which has been shown to occur in response to ADP

491 at 37°C that alters respiration rates (33, 39). Polarographic oxygen measurements were acquired  
492 in 2 second intervals with the rate of respiration derived from 40 data points and expressed as  
493 pmol/s/mg wet weight. PmFB were weighed in ~1.5 mL of tared BIOPS to relax muscle as noted  
494 above.

495  
496 *Mitochondrial H<sub>2</sub>O<sub>2</sub> Emission (mH<sub>2</sub>O<sub>2</sub>)*. mH<sub>2</sub>O<sub>2</sub> was determined spectrofluorometrically  
497 (QuantaMaster 40, HORIBA Scientific, Edison, NJ, USA) in a quartz cuvette with continuous  
498 stirring at 37°C, in 1 mL of Buffer Z supplemented with 10 µM Amplex Ultra Red, 0.5 U/ml  
499 horseradish peroxidase, 1mM EGTA, 40 U/ml Cu/Zn-SOD1, 5 µM BLEB and 20mM Cr. Buffer  
500 Z contained (in mM) 105 K-MES, 30 KCl, 10 KH<sub>2</sub>PO<sub>4</sub>, 5 MgCl<sub>2</sub> • 6H<sub>2</sub>O, 1 EGTA, and 5mg/mL  
501 BSA (pH 7.4). State II mH<sub>2</sub>O<sub>2</sub> (maximal emission in the absence of ADP) was induced using the  
502 Complex I-supporting substrates (NADH) pyruvate (10mM) and malate (2mM) to assess maximal  
503 (State II, no ADP) mH<sub>2</sub>O<sub>2</sub> as described previously (18). Following the induction of State II mH<sub>2</sub>O<sub>2</sub>,  
504 a titration of ADP was employed to progressively attenuate mH<sub>2</sub>O<sub>2</sub> as occurs when membrane  
505 potential declines during oxidative phosphorylation (Figure 5). After the experiments, the fibers  
506 were rinsed in double deionized H<sub>2</sub>O, lyophilized in a freeze-dryer (Labconco, Kansas City, MO,  
507 USA) for > 4h and weighed on a microbalance (Sartorius Cubis Microbalance, Gottingen  
508 Germany). The rate of mH<sub>2</sub>O<sub>2</sub> emission was calculated from the slope (F/min) using a standard  
509 curve established with the same reaction conditions and normalized to fibre bundle dry weight.

510

### 511 **Western Blotting**

512 A frozen piece of quadriceps and diaphragm from each animal was homogenized in a plastic  
513 microcentrifuge tube with a tapered Teflon pestle in ice-cold buffer containing (mm) 20 Tris/HCl,  
514 150 NaCl, 1 EDTA, 1 EGTA, 2.5 Na<sub>4</sub>O<sub>7</sub>P<sub>2</sub>, 1 Na<sub>3</sub>VO<sub>4</sub>, 1% Triton X-100 and PhosSTOP inhibitor  
515 tablet (Millipore Sigma, Burlington, MA, USA) (pH 7.0) as published previously (40). Protein  
516 concentrations were determined using a bicinchoninic acid (BCA) assay (Life Technologies,  
517 Carlsbad, CA, USA). 15-30 µg of denatured and reduced protein was subjected to 10-12% gradient  
518 SDS-PAGE followed by transfer to low-fluorescence polyvinylidene difluoride membrane.  
519 Membranes were blocked with Odyssey Blocking Buffer (LI-COR, Lincoln NE, USA) and  
520 immunoblotted overnight (4°C) with antibodies specific to each protein. A commercially available  
521 monoclonal antibody was used to detect electron transport chain proteins (rodent OXPHOS

522 Cocktail, ab110413; Abcam, Cambridge, UK, 1:250 dilution), including V-ATP5A (55kDa), III-  
523 UQCRC2 (48kDa), IV-MTCO1 (40kDa), II-SDHB (30 kDa), and I-NDUFB8 (20 kDa).  
524 Commercially available polyclonal antibodies were used to detect AMP-activated protein kinase $\alpha$   
525 (AMPK $\alpha$ ) (rabbit, CST, 2532; 62kDa; 1:1000) and Phospho-AMPK $\alpha$  Thr172 (P-AMPK) (rabbit  
526 CST, 2535, 62kDa; 1:500) as used previously (40).

527  
528 After overnight incubation in primary antibodies, membranes were washed 3x5 minutes in TBST  
529 and incubated for 1 hour at room temperature with the corresponding infrared fluorescent  
530 secondary antibody (LI-COR IRDye 680nm or 800nm) at a dilution previously optimized (1:20  
531 000). Immunoreactive proteins were detected by infrared imaging (LI-COR CLx; LI-COR) and  
532 quantified by densitometry using ImageJ. All images were normalized to Amido Black total  
533 protein stain (A8181, Sigma) using the entire lane corresponding to each sample.

534

### 535 **Immunofluorescence Analysis**

536 Quadriceps (vastus intermedius & vastus lateralis) and diaphragm muscle samples embedded in  
537 O.C.T medium (Fisher Scientific) were cut into 10- $\mu$ m- thick sections with a cryostat (HM525  
538 NX, Thermo Fisher Scientific, Mississauga, ON, Canada) maintained at -20°C. Muscle fibre type  
539 was determined as previously described (41), with minor modifications. All primary antibodies  
540 were purchased from the Developmental Studies Hybridoma Bank (University of Iowa), and  
541 secondary antibodies were purchased from Invitrogen (Burlington, ON, Canada). Briefly, slides  
542 were blocked with 5% goat serum (Sigma Aldrich) in PBS for 1 hour at room temperature. Next,  
543 slides were incubated with primary antibodies against myosin heavy chain (MHC) I (BA-F8; 1:25),  
544 MHC IIA (SC-71; 1:1000) and MHC IIB (BF-F3; 1:50) for 2 hours at room temperature.  
545 Afterwards, slides were washed 3x in PBS for 5 minutes and then incubated with secondary  
546 antibodies (MHCI; Alexa Fluor 350 IgG2b; 1:1000), (MHCIIa; Alexa Fluor 488 IgG1; 1:1000),  
547 (MHC Iib; Alexa Fluor 568 IgM; 1:1000) for 1 hour at room temperature. Slides were then washed  
548 3x in PBS for 5 minutes and mounted with ProLong antifade reagent (Life Technologies,  
549 Burlington, ON, Canada). Images were acquired the next day using EVOS FL Auto 2 Imaging  
550 System (Invitrogen, Thermo Fisher Scientific, Mississauga, ON, Canada). Individual images were  
551 taken across the entire cross section and then assembled into a composite image. 20-30 muscle  
552 fibers per fiber type were selected randomly throughout the cross section and traced with ImageJ

553 software to assess CSA after calibrations with a corresponding scale bar. Muscle fibers that  
554 appeared black were recorded as MHC IIX (41).

555

## 556 **Statistics**

557 Results are expressed as mean  $\pm$  SEM. The level of significance was established at  $P < 0.05$  for  
558 all statistics. The D'Agostino – Pearson omnibus normality test was first performed to determine  
559 whether data resembled a Gaussian distribution. Western blot results for proteins in the electron  
560 transport chain subunit complexes I, IV and V in quadriceps failed normality as did proteins in  
561 complexes I, II, IV and V for diaphragm. In addition, quadriceps and diaphragm delta glutamate  
562 respiration failed normality and were analyzed using a non-parametric Mann-Whitney t-test. All  
563 other data passed normality. A two-tailed unpaired t-test was used to compare C26 to PBS within  
564 each time point with respect to muscle mass, fibre cross-sectional area, and remaining western  
565 blots. Mitochondrial respiration,  $mH_2O_2$  and force-frequency were analyzed using a two-way  
566 ANOVA with factors of timepoint (2 vs 4 week) and treatment (C26 vs PBS) followed by  
567 Benjamini, Krieger and Yekutieli's post-hoc analysis when a main affect was obtained to identify  
568 a significant interaction between groups (GraphPad Prism Software 8.4.2, La Jolla, CA, USA)  
569 (42).

570

## 571 **Study Approval**

572 All experiments and procedures were approved by the Animal Care Committee at York University  
573 (AUP Approval Number 2019-10) in accordance with the Canadian Council on Animal Care.

574

## 575 **Author Contributions**

576 L.J.D., C.A.B, M.R.C., N.P.G. and C.G.R.P. contributed to the rationale and study design. L.J.D.,  
577 C.A.B., S.G. and C.G.R.P. conducted all experiments and/or analyzed all data. C.G.R.P. and L.J.D.  
578 wrote the manuscript. All authors contributed to the interpretation of the data and manuscript  
579 preparation. All authors have approved the final version of the manuscript and agree to be  
580 accountable for all aspects of the work. All persons designated as authors qualify for authorship,  
581 and all those who qualify for authorship are listed.

582

## 583 **Acknowledgments**

584 Funding was provided to C.G.R.P. by the National Science and Engineering Research Council (no.  
585 436138-2013 and no.2019-06687) and an Ontario Early Researcher Award (C.G.R.P., no. 2017-  
586 0351) with infrastructure supported by the Canada Foundation for Innovation, the Ontario  
587 Research Fund and the James. H. Cummings Foundation. L.J.D. was supported by a NSERC CGS-  
588 M scholarship. C.A.B. was supported by a NSERC PGS-D scholarship. S.G. was supported by an  
589 Ontario Graduate Scholarship. N.P.G. was funded by U.S. National Institutes of Health under  
590 Award Number R01AR075794 from the National Institute of Arthritis and Musculoskeletal and  
591 Skin Diseases.  
592  
593

594 **References**

- 595 1. Fearon K, et al. Definition and classification of cancer cachexia: An international  
596 consensus. *Lancet Oncol.* 2011;12(5):489-495. doi:10.1016/S1470-2045(10)70218-7
- 597 2. Kasvis P, et al. Health-related quality of life across cancer cachexia stages. *Ann Palliat*  
598 *Med.* 2019;8(1):33-42. doi:10.21037/apm.2018.08.04
- 599 3. Dewys WD, et al. Prognostic effect of weight loss prior to chemotherapy in cancer  
600 patients. Eastern Cooperative Oncology Group. *Am J Med.* 1980;69(4):491-497.  
601 doi:10.1016/s0149-2918(05)80001-3
- 602 4. Baracos VE, et al. Cancer cachexia is defined by an ongoing loss of skeletal muscle mass.  
603 *Ann Palliat Med Vol 8, No 1 (January 2019) Ann Palliat Med (Update Cancer Cachexia*  
604 *Mem Ken Fearon)*. Published online 2018. <https://apm.amegroups.com/article/view/22915>
- 605 5. Arthur ST, et al. Cachexia among US cancer patients. *J Med Econ.* 2016;19(9):874-880.  
606 doi:10.1080/13696998.2016.1181640
- 607 6. Tan BHL, Fearon KCH. Cachexia: Prevalence and impact in medicine. *Curr Opin Clin*  
608 *Nutr Metab Care.* 2008;11(4):400-407. doi:10.1097/MCO.0b013e328300ecc1
- 609 7. Tisdale MJ. Molecular pathways leading to cancer cachexia. *Physiology.* 2005;20:340-  
610 348. doi:10.1152/physiol.00019.2005
- 611 8. Argilés JM, et al. Cancer cachexia: Understanding the molecular basis. *Nat Rev Cancer.*  
612 Published online 2014:754-762. doi:10.1038/nrc3829
- 613 9. Halle JL, et al. Tissue-specific dysregulation of mitochondrial respiratory capacity and  
614 coupling control in colon-26 tumor-induced cachexia. *Am J Physiol Regul Integr Comp*  
615 *Physiol.* 2019;317(1):R68-R82. doi:10.1152/ajpregu.00028.2019
- 616 10. White JP, et al. Muscle oxidative capacity during IL-6-dependent cancer cachexia. *Am J*  
617 *Physiol - Regul Integr Comp Physiol.* 2011;300(2):R201-R211.  
618 doi:10.1152/ajpregu.00300.2010
- 619 11. Neyroud D, et al. Colon 26 adenocarcinoma (C26)-induced cancer cachexia impairs  
620 skeletal muscle mitochondrial function and content. *J Muscle Res Cell Motil.*  
621 2019;40(1):59-65. doi:10.1007/s10974-019-09510-4

- 622 12. Brown JL, et al. Mitochondrial degeneration precedes the development of muscle atrophy  
623 in progression of cancer cachexia in tumour-bearing mice. *J Cachexia Sarcopenia Muscle*.  
624 2017;8(6):926-938. doi:10.1002/jcsm.12232
- 625 13. Smuder AJ, et al. Pharmacological targeting of mitochondrial function and reactive  
626 oxygen species production prevents colon 26 cancer-induced cardiorespiratory muscle  
627 weakness. *Oncotarget*. 2020;11(38):3502-3514. doi:10.18632/oncotarget.27748
- 628 14. Ballarò R, et al. Targeting Mitochondria by SS-31 Ameliorates the Whole Body Energy  
629 Status in Cancer- and Chemotherapy-Induced Cachexia. *Cancers (Basel)*. 2021;13(4):850.  
630 doi:10.3390/cancers13040850
- 631 15. Toyama EQ, et al. AMP-activated protein kinase mediates mitochondrial fission in  
632 response to energy stress. *Science*. 2016;351(6270):275-281. doi:10.1126/science.aab4138
- 633 16. Hancock CR, et al. High-fat diets cause insulin resistance despite an increase in muscle  
634 mitochondria. *Proc Natl Acad Sci*. 2008;105(22):7815 LP - 7820.  
635 doi:10.1073/pnas.0802057105
- 636 17. Hughes MC, et al. Impairments in left ventricular mitochondrial bioenergetics precede  
637 overt cardiac dysfunction and remodelling in Duchenne muscular dystrophy. *J Physiol*.  
638 2020;598(7):1377-1392. doi:10.1113/JP277306
- 639 18. Hughes MC, et al. Early myopathy in Duchenne muscular dystrophy is associated with  
640 elevated mitochondrial H<sub>2</sub>O<sub>2</sub> emission during impaired oxidative phosphorylation. *J*  
641 *Cachexia Sarcopenia Muscle*. 2019;10(3):643-661. doi:10.1002/jcsm.12405
- 642 19. Ramos S V, et al. Mitochondrial bioenergetic dysfunction in the D2.mdx model of  
643 Duchenne muscular dystrophy is associated with microtubule disorganization in skeletal  
644 muscle. *PLoS One*. 2020;15(10):e0237138. doi:10.1371/journal.pone.0237138
- 645 20. Turnbull PC, et al. The fatty acid derivative palmitoylcarnitine abrogates colorectal cancer  
646 cell survival by depleting glutathione. *Am J Physiol Cell Physiol*. 2019;317(6):C1278-  
647 C1288. doi:10.1152/ajpcell.00319.2019
- 648 21. Kuznetsov A V, et al. Striking differences between the kinetics of regulation of respiration  
649 by ADP in slow-twitch and fast-twitch muscles in vivo. *Eur J Biochem*. 1996;241(3):909-  
650 915. doi:10.1111/j.1432-1033.1996.00909.x



- 651 22. Schlattner U, et al. Mitochondrial Proteolipid Complexes of Creatine Kinase. *Subcell*  
652 *Biochem.* 2018;87:365-408. doi:10.1007/978-981-10-7757-9\_13
- 653 23. Nicholls DG, Ferguson SJ. *Bioenergetics (Fourth Edition).*; 2013.
- 654 24. Rosa-Caldwell ME, et al. Mitochondrial Function and Protein Turnover in the Diaphragm  
655 are Altered in LLC Tumor Model of Cancer Cachexia. *Int J Mol Sci.* 2020;21(21):7841.  
656 doi:10.3390/ijms21217841
- 657 25. Julienne CM, et al. Cancer cachexia is associated with a decrease in skeletal muscle  
658 mitochondrial oxidative capacities without alteration of ATP production efficiency. *J*  
659 *Cachexia Sarcopenia Muscle.* 2012;3(4):265-275. doi:10.1007/s13539-012-0071-9
- 660 26. Steinberg GR, Kemp BE. AMPK in Health and Disease. *Physiol Rev.* 2009;89(3):1025-  
661 1078. doi:10.1152/physrev.00011.2008
- 662 27. Hargreaves M, Spriet LL. Skeletal muscle energy metabolism during exercise. *Nat Metab.*  
663 2020;2(9):817-828. doi:10.1038/s42255-020-0251-4
- 664 28. Mina DS, et al. Exercise as part of routine cancer care. *Lancet Oncol.* 2018;19(9):e433-  
665 e436. doi:10.1016/S1470-2045(18)30599-0
- 666 29. Talbert EE, et al. Modeling human cancer cachexia in colon 26 tumor-bearing adult mice.  
667 *J Cachexia Sarcopenia Muscle.* 2014;5(4):321-328. doi:10.1007/s13539-014-0141-2
- 668 30. Pratt SJP, Lovering RM. A stepwise procedure to test contractility and susceptibility to  
669 injury for the rodent quadriceps muscle. *J Biol methods.* 2014;1(2):e8.  
670 doi:10.14440/jbm.2014.34
- 671 31. Fajardo VA, et al. Diaphragm assessment in mice overexpressing phospholamban in slow-  
672 twitch type I muscle fibers. *Brain Behav.* 2016;6(6):e00470. doi:10.1002/brb3.470
- 673 32. Ramos S V, et al. Altered skeletal muscle microtubule-mitochondrial VDAC2 binding is  
674 related to bioenergetic impairments after paclitaxel but not vinblastine chemotherapies.  
675 *Am J Physiol - Cell Physiol.* 2019;316(3):C449-C445. doi:10.1152/ajpcell.00384.2018
- 676 33. Perry CGR, et al. Inhibiting myosin-ATPase reveals a dynamic range of mitochondrial  
677 respiratory control in skeletal muscle. *Biochem J.* 2011;437(2):215-222.  
678 doi:10.1042/BJ20110366

- 679 34. Walsh B, et al. The role of phosphorylcreatine and creatine in the regulation of  
680 mitochondrial respiration in human skeletal muscle. *J Physiol*. 2001;537(3):971-978.  
681 doi:<https://doi.org/10.1111/j.1469-7793.2001.00971.x>
- 682 35. Perry CGR, et al. High-intensity aerobic interval training increases fat and carbohydrate  
683 metabolic capacities in human skeletal muscle. *Appl Physiol Nutr Metab = Physiol Appl*  
684 *Nutr Metab*. 2008;33(6):1112-1123. doi:10.1139/H08-097
- 685 36. Chen Z-P, et al. Effect of Exercise Intensity on Skeletal Muscle AMPK Signaling in  
686 Humans. *Diabetes*. 2003;52(9):2205 LP - 2212. doi:10.2337/diabetes.52.9.2205
- 687 37. Jubrias SA, et al. Acidosis inhibits oxidative phosphorylation in contracting human  
688 skeletal muscle in vivo. *J Physiol*. 2003;553(2):589-599.  
689 doi:<https://doi.org/10.1113/jphysiol.2003.045872>
- 690 38. Wackerhage H, et al. Recovery of free ADP, Pi, and free energy of ATP hydrolysis in  
691 human skeletal muscle. *J Appl Physiol*. 1998;85(6):2140-2145.  
692 doi:10.1152/jappl.1998.85.6.2140
- 693 39. Hughes MC, et al. Mitochondrial Bioenergetics and Fiber Type Assessments in  
694 Microbiopsy vs. Bergstrom Percutaneous Sampling of Human Skeletal Muscle. *Front*  
695 *Physiol*. 2015;6:360. doi:10.3389/fphys.2015.00360
- 696 40. Houde VP, et al. AMPK  $\beta$ 1 reduces tumor progression and improves survival in p53 null  
697 mice. *Mol Oncol*. 2017;11(9):1143-1155. doi:10.1002/1878-0261.12079
- 698 41. Bloemberg D, Quadriatero J. Rapid determination of myosin heavy chain expression in  
699 rat, mouse, and human skeletal muscle using multicolor immunofluorescence analysis.  
700 *PLoS One*. 2012;7(4):e35273. doi:10.1371/journal.pone.0035273
- 701 42. Glickman ME, et al. False discovery rate control is a recommended alternative  
702 to Bonferroni-type adjustments in health studies. *J Clin Epidemiol*. 2014;67(8):850-857.  
703 doi:<https://doi.org/10.1016/j.jclinepi.2014.03.012>
- 704 43. Aliev M, et al. Molecular system bioenergetics of the heart: experimental studies of  
705 metabolic compartmentation and energy fluxes versus computer modeling. *Int J Mol Sci*.  
706 2011;12(12):9296-9331. doi:10.3390/ijms12129296
- 707 44. Guzun R, et al. Regulation of respiration in muscle cells in vivo by VDAC through

708 interaction with the cytoskeleton and MtCK within Mitochondrial Interactosome. *Biochim*  
709 *Biophys Acta - Biomembr.* 2012;1818(6):1545-1554.  
710 doi:<https://doi.org/10.1016/j.bbamem.2011.12.034>

711 45. Wallimann T, et al. The creatine kinase system and pleiotropic effects of creatine. *Amino*  
712 *Acids.* 2011;40(5):1271-1296. doi:10.1007/s00726-011-0877-3

713

714

715 **Figure Legends**

716 **Figure 1** The effects of C26 colon cancer cells implantation on body size, tumour size, muscle  
717 mass and force. Analysis of CD2F1 mice with subcutaneous C26 implantations or with PBS were  
718 performed. Body weights (*A*,  $n=8-16$ ) and tumour-free body weights (*B*,  $n=8-16$ ) were analyzed  
719 every week (2<sup>&</sup> mice were measured at a 14-17 day window and 4<sup>&</sup> mice were measured on a 26-  
720 29 day window). Percent change in tumour free body weights were analyzed from day 0 to end  
721 point (*C*,  $n=8-16$ ). *In vivo* tumour volume measurements were made using calipers (*D*,  $n=16$ ).  
722 Tumour mass (*E*,  $n=7-16$ ) and spleen mass (*F*,  $n=8-16$ ) measurements were also completed.  
723 Evaluation of hindlimb muscle wet weights were made in the 2-week cohort (*G*,  $n=8$ ) and 4-week  
724 cohort (*H*,  $n=16$ ). Results represent mean  $\pm$  SEM; #  $P<0.05$  PBS(2wk) vs C26(2wk); \*  $P<0.05$   
725 PBS(4wk) vs C26(4wk).

726  
727 **Figure 2** The effects of C26 colon cancer on quadriceps and diaphragm force production. *In situ*  
728 quadriceps force production was assessed using the force frequency relationship (*A*,  $n=6-14$ ) and  
729 *in vitro* diaphragm force production was also measured using the force frequency relationship (*B*,  
730  $n=6-12$ ). Results represent mean  $\pm$  SEM; #  $P<0.05$  PBS(2wk) vs C26(2wk); \*  $P<0.05$  PBS(4wk)  
731 vs C26(4wk); \$  $P<0.05$  C26 (2wk) vs C26 (4wk).

732  
733 **Figure 3** Evaluation of quadriceps and diaphragm fibre-type atrophy in skeletal muscle from C26  
734 tumour-bearing mice. Analysis of fibre histology on MHC isoforms of PBS and C26 mice was  
735 performed. Cross-sectional area of MHC stains was evaluated in the quadriceps (*A*,  $n=8$ ; *B*,  
736 representative image, magnification x 20) and diaphragm at 2 weeks of tumour bearing (*C*,  $n=6$ ;  
737 *D*, representative image, magnification x 20). The same was completed for the quadriceps (*E*,  $n=9$ ;  
738 *F*, representative image, magnification x 20) and diaphragm at 4 weeks of tumour bearing (*G*,  $n=9$ ;  
739 *H*, representative image, magnification x 20). Results represent mean  $\pm$  SEM; \*  $P<0.05$  PBS (4wk)  
740 vs C26(4wk).

741  
742 **Figure 4** Muscle-specific changes in markers of oxidative phosphorylation in C26 tumour-bearing  
743 skeletal muscle. Protein content of electron transport chain components were quantified at in the  
744 quadriceps (*A*,  $n=8$ ) and diaphragm at 2 weeks (*B*,  $n=8$ ) and 4 weeks in both muscles respectively

745 *C, D n=12*). *E*, representative image for quadriceps and *F*, representative image for diaphragm.  
746 Results represent mean  $\pm$  SEM; \*  $P < 0.05$  PBS (4wk) vs C26 (4wk).

747

748 **Figure 5** Schematic representation of energy homeostasis in low metabolic (left) vs. high  
749 metabolic (right) demand states. When ADP is low, less ATP is produced. A concomitant  
750 accumulation of  $[H^+]$  in the inner membrane space (IMS) increases membrane potential ( $\Delta\Psi$ ),  
751 attenuates  $H^+$  pumping, induces premature electron slip and generates superoxide ( $O^{\bullet-}$ ) which is  
752 dismutated to  $H_2O_2$  by manganese superoxide dismutase (MnSOD; top left). Only Complex I-  
753 derived superoxide is displayed. When ADP is high, more ATP is produced as  $[H^+]$  diffuse from  
754 the IMS to the mitochondrial matrix through ATP synthase. The decrease in  $\Delta\Psi$  lowers premature  
755 electron slip, generating less  $O^{\bullet-}$  and  $H_2O_2$  (top right). ADP generated by ATPases throughout the  
756 cell enter the matrix through the voltage dependent anion channel (VDAC) on the outer  
757 mitochondrial membrane (OMM) and the adenine nucleotide translocase (ANT) on the inner  
758 mitochondrial membrane (IMM; bottom left). Creatine accelerates matrix ADP/ATP cycling and  
759 ATP synthesis by reducing the diffusion distance of the slower diffusing ADP and ATP while  
760 shuttling phosphate to the cytoplasm through rapidly diffusing phosphocreatine which is used by  
761 cytosolic creatine kinase (cCK) to recycle local ATP to support the activity of various ATPases.  
762 Rapidly diffusing creatine returns to the IMS to be re-phosphorylated by mitochondrial creatine  
763 kinase (mtCK). Non-ATPase sites of ATP hydrolysis are not displayed but also contribute to net  
764 metabolic demand (kinases, and other ATP-dependent processes). The net effect of metabolic  
765 demand (global ATP hydrolysis) on matrix ADP/ATP cycling is displayed under the context of  
766 creatine independent (-Creatine) and creatine dependent (+Creatine) conditions. Figure adapted  
767 from *Aliev et al.*, 2011, *Guzun et al.*, 2012, *Wallimann et al.*, 2011 and Nicholls 2013(23, 43–45).  
768 Created with BioRender.com

769

770 **Figure 6** Complex I-supported mitochondrial respiration in quadriceps muscle of C26 tumour-  
771 bearing mice. ADP-stimulated (State III) respiration, supported by complex I supported (NADH)  
772 substrates pyruvate (5mM) and malate (2mM), was assessed in the absence (-Creatine) and  
773 presence (+Creatine) of 20mM creatine at a range of  $[ADP]$  until maximal respiration was  
774 achieved to model a spectrum of metabolic demands. Respiration was assessed in the quadriceps  
775 normalized to bundle size at 2 weeks (*A, B*) and normalized to ETC subunit content (*C, D*) to

776 permit comparisons of intrinsic mitochondrial respiratory responses in each group. Creatine  
777 sensitivity was assessed by calculating the +creatine/-creatine ratio (*E, F*) given creatine normally  
778 increases ADP-stimulated respiration. The same measurements were completed at 4 weeks (*G-L*).  
779 Results represent mean  $\pm$  SEM; n=8-16; #  $P<0.05$ , PBS(2wk) vs C26(2wk); \*  $P<0.05$ , PBS(4wk)  
780 vs C26(4wk).

781

782 **Figure 7** Complex I-supported mitochondrial respiration in diaphragm muscle of C26 tumour-  
783 bearing mice. ADP-stimulated (State III) respiration, supported by complex I supported (NADH)  
784 substrates pyruvate (5mM) and malate (2mM), was assessed in the absence (-Creatine) and  
785 presence (+Creatine) of 20mM creatine at a range of [ADP] until maximal respiration was  
786 achieved to model a spectrum of metabolic demands. Respiration was assessed in the diaphragm  
787 normalized to bundle size at 2 weeks (*A, B*) and normalized to ETC subunit content (*C, D*) to  
788 permit comparisons of intrinsic mitochondrial respiratory responses in each group. Creatine  
789 sensitivity was assessed by calculating the +creatine/-creatine ratio (*E, F*) given creatine normally  
790 increases ADP-stimulated respiration. The same measurements were completed at 4 weeks (*G-L*).  
791 Results represent mean  $\pm$  SEM; n=8-16; \*  $P<0.05$ , PBS(4wk) vs C26(4wk)

792

793 **Figure 8** Muscle-specific changes in markers of growth in C26 tumour-bearing skeletal muscle.  
794 Protein content of AMPK $\alpha$  and P-AMPK $\alpha$  were quantified at in the quadriceps at 2 weeks (*A*,  
795 n=8) and 4 weeks (*B*, n=12). Markers were also quantified at in the diaphragm at 2 weeks (*C*, n=8)  
796 and 4 weeks (*D*, n=12). *E*, representative image for quadriceps and *F*, representative image for  
797 diaphragm. Results represent mean  $\pm$  SEM.

798

799 **Figure 9** Complex I stimulated mH<sub>2</sub>O<sub>2</sub> emission in quadriceps and diaphragm muscle of C26  
800 tumour bearing mice. At 2 and 4 weeks, quadriceps mH<sub>2</sub>O<sub>2</sub> emission supported by pyruvate  
801 (10mM) and malate (2mM) (NADH) was assessed under maximal State II (no ADP) conditions in  
802 the presence of 20mM creatine (*A, E*) and under a range of [ADP] to model metabolic demand (*B*,  
803 *F*). These measures were also normalized to total ETC subunit content (*C, D, G, H*) to permit  
804 comparisons of intrinsic mitochondrial respiratory responses in each group. These measures were  
805 repeated in the diaphragm (*I-P*). Results represent mean  $\pm$  SEM; n=8-16; #  $P<0.05$ , PBS(2wk) vs  
806 C26(2wk); \*  $P<0.05$ , PBS(4wk) vs C26(4wk)

807

808 **Figure 10** Summary of the time-dependent and muscle-specific adaptations to C26 xenografts in  
809 CD2F1 mice. At 2 weeks, early impairments in force generating capacity are associated with  
810 reductions in mitochondrial pyruvate/malate-supported ADP-stimulated respiration in quadriceps  
811 and elevated  $mH_2O_2$  emission in diaphragm. These distinct mitochondrial responses precede  
812 atrophy in both muscles by 4 weeks. At this time, quadriceps and diaphragm responses to C26  
813 become heterogeneous. The restoration of force generating capacity in quadriceps in spite of  
814 atrophy is not observed in the diaphragm even though both muscles demonstrate apparent  
815 compensatory increases in mitochondrial ADP-stimulated respiration. The mitochondrial  
816 responses to cancer are more diverse in quadriceps than diaphragm, with increases in respiration  
817 by 4 weeks occurring as a potential compensation for reductions in mitochondrial electron  
818 transport chain markers. Mitochondrial creatine metabolism is impaired in quadriceps by 4 weeks.  
819 Created with BioRender.com

820

### 821 **Supplemental Figure Legends**

822 **Figure S1** Multiple substrate evaluation of oxygen consumption in quadriceps permeabilized  
823 muscle fibre bundles. Oxygen consumption was evaluated in the absence of creatine at 2 weeks  
824 and 4 weeks post C26 implantation or PBS injections in permeabilized muscle fibres when  
825 stimulated with glutamate (*A, B*), succinate (*E, F*) and pyruvate/malate (*I, J*). This was repeated in  
826 the presence of 20mM Creatine (*C, D, G, H, K, L*). Results represent mean  $\pm$  SEM; n=8-16; #  
827  $P<0.05$  PBS (2wk) vs C26 (2wk); \*  $P<0.05$  PBS (4wk) vs C26 (4wk)

828

829 **Figure S2** Multiple substrate evaluation of oxygen consumption in diaphragm permeabilized  
830 muscle fibre bundles. Oxygen consumption was evaluated in the absence of creatine at 2 weeks  
831 and 4 weeks post C26 implantation or PBS injections in permeabilized muscle fibres when  
832 stimulated with glutamate (*A, B*), succinate (*E, F*) and pyruvate/malate (*I, J*). This was repeated in  
833 the presence of 20mM Creatine (*C, D, G, H, K, L*). Results represent mean  $\pm$  SEM; n=8-16; #  
834  $P<0.05$  PBS (2wk) vs C26 (2wk); \*  $P<0.05$  PBS (4wk) vs C26 (4wk).

835

836 **Figure S3** Succinate stimulated  $mH_2O_2$  emission in quadriceps and diaphragm muscle of C26  
837 tumour bearing mice. At 2 and 4 weeks, quadriceps  $mH_2O_2$  emission supported by succinate

838 (10mM) (FADH<sub>2</sub>) was assessed under maximal State II (no ADP) conditions in the absence of  
839 creatine (*A, E*) and in the presence of 20mM Creatine (*C, G*). State III (range of [ADP] to model  
840 metabolic demand) was also assessed in the absence of creatine (*B, F*) and in the presence of 20mM  
841 creatine (*D and H*). These measures were repeated in the diaphragm (I-P). Results represent mean  
842 ± SEM; n=7-16; # *P*<0.05, PBS (2wk) vs C26 (2wk); \* *P*<0.05, PBS (4wk) vs C26 (4wk).



**Figure 1**

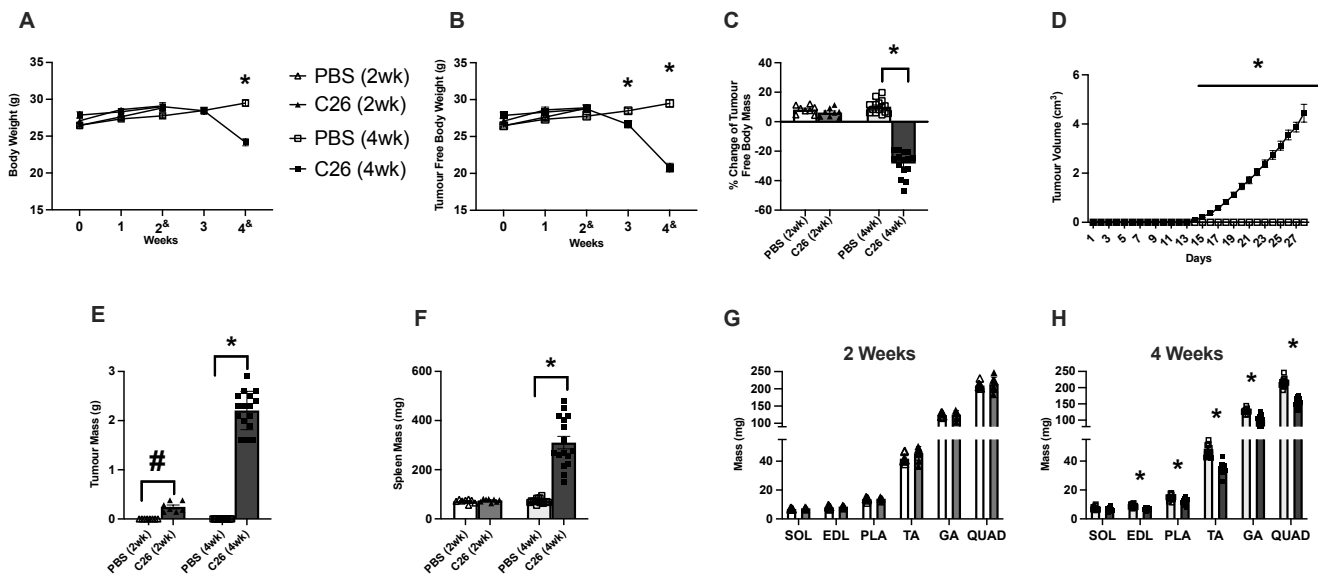

Figure 2

### Quadriceps

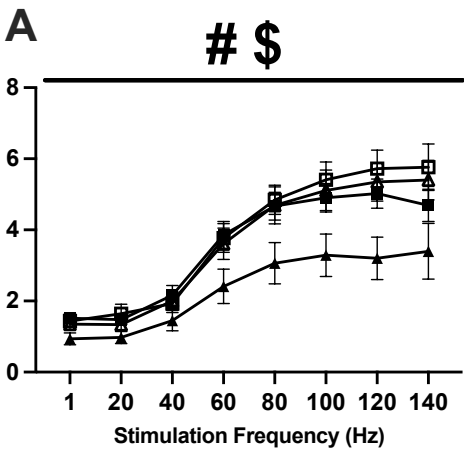

### Diaphragm

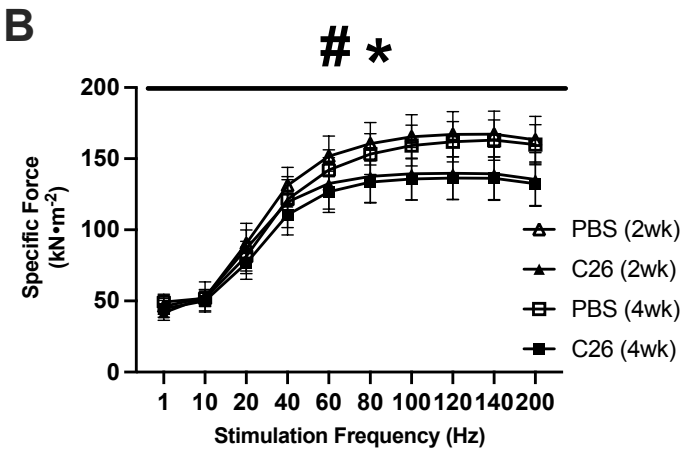

Figure 3

2 week

4 week

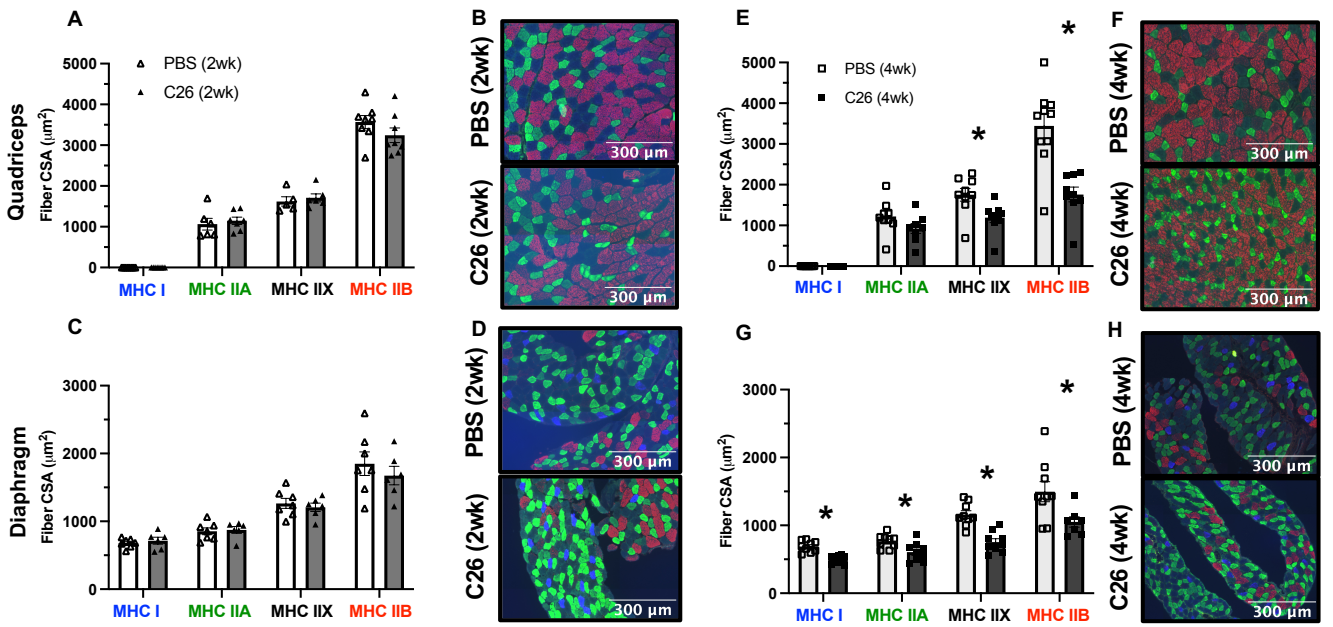

Figure 4

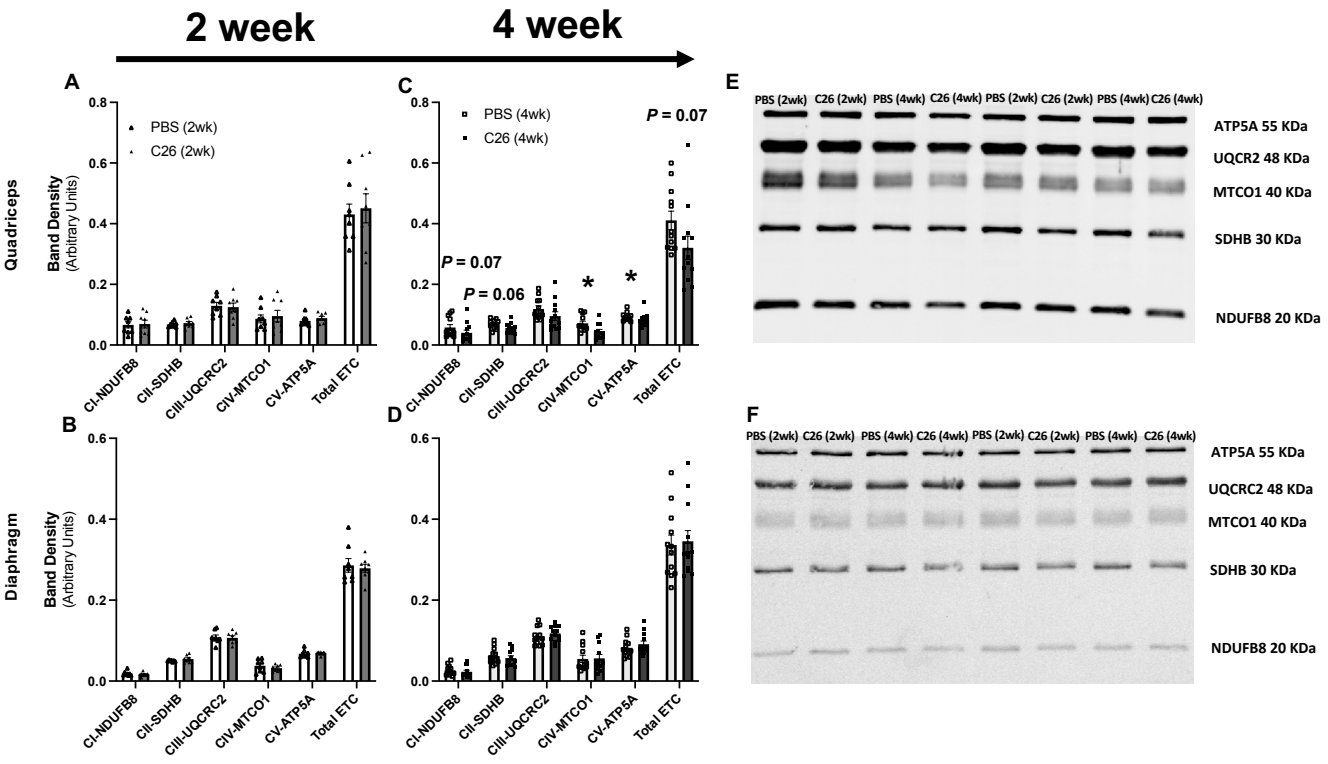

Figure 5

Low Metabolic Demand (Low ADP)

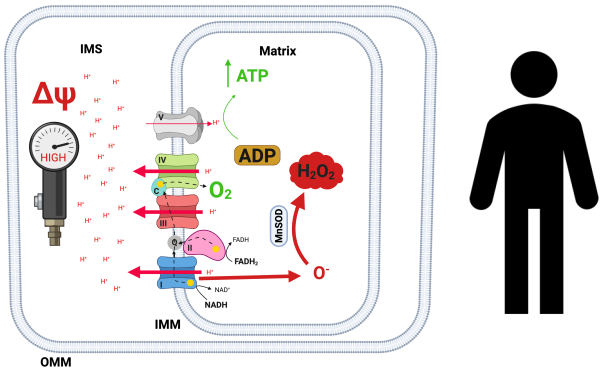

High Metabolic Demand (High ADP)

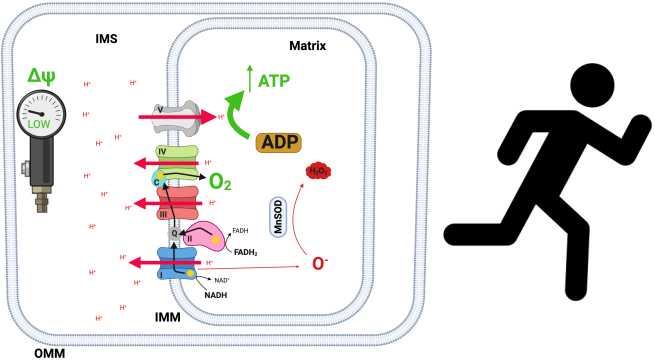

ATP/ADP Import/Export (Low ADP)

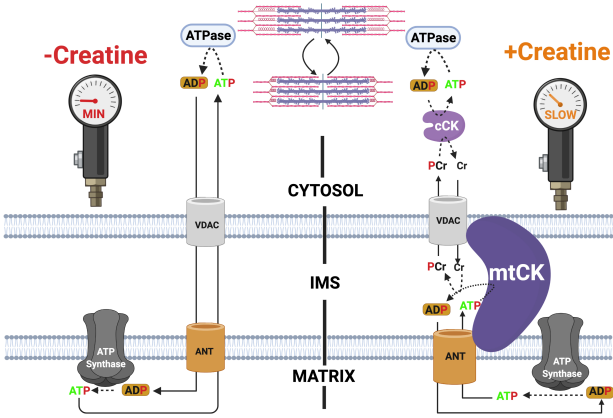

ATP/ADP Import/Export (High ADP)

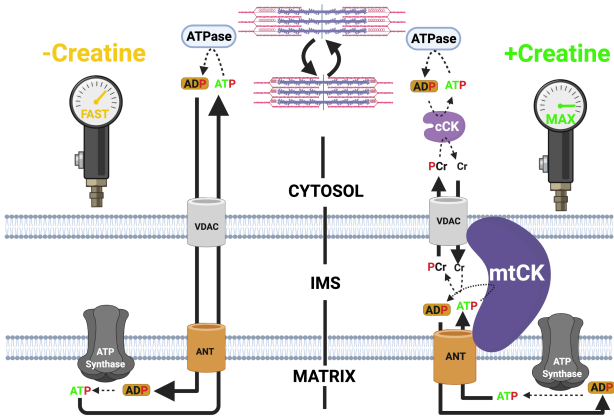

Figure 6

# Quadriceps ADP-Stimulated Mitochondrial Respiration

2 week

4 week

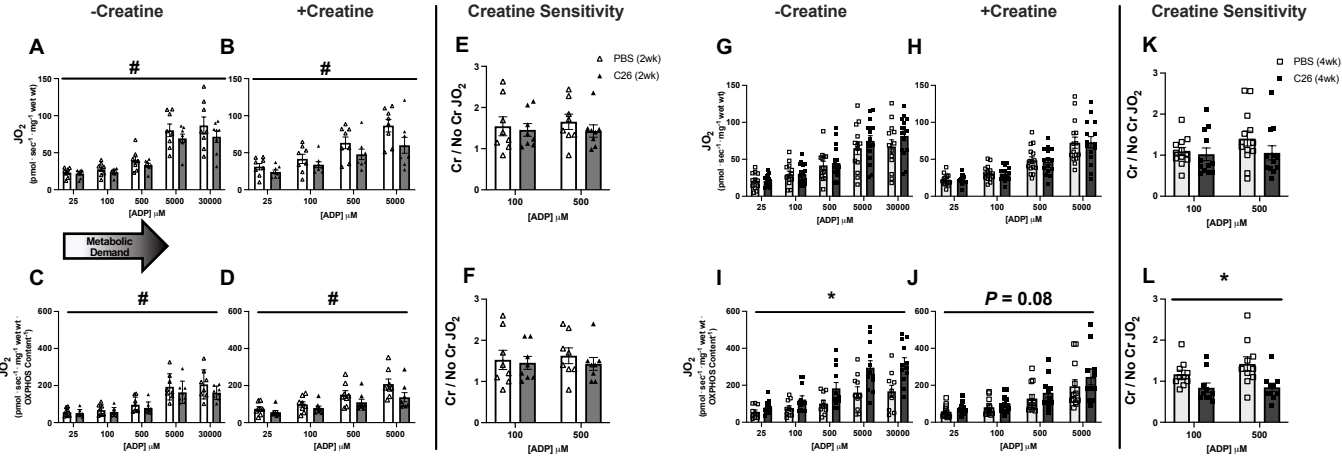

Figure 7

## Diaphragm ADP-Stimulated Mitochondrial Respiration

2 week

4 week

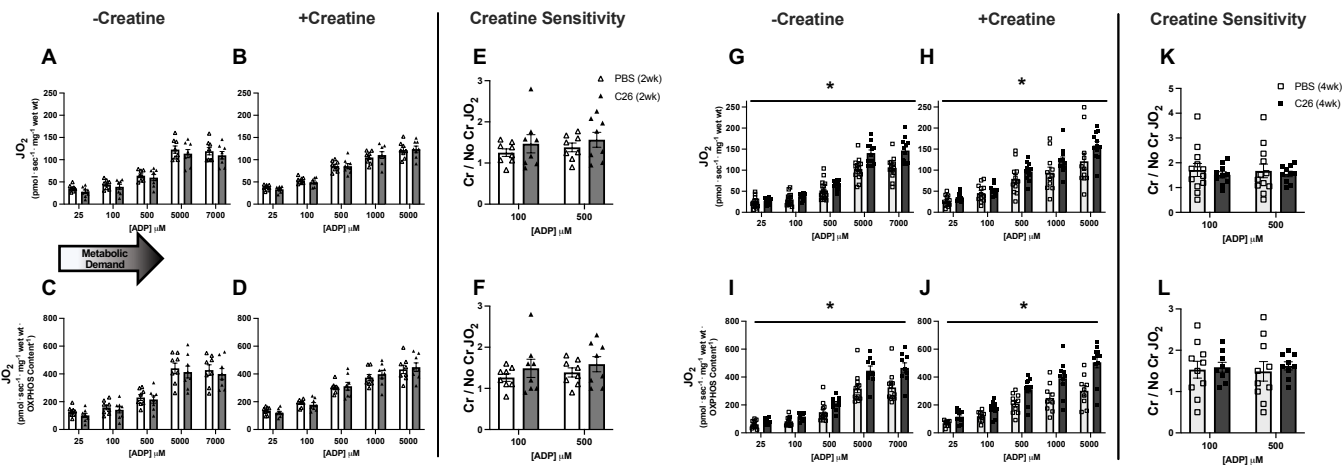

Figure 8

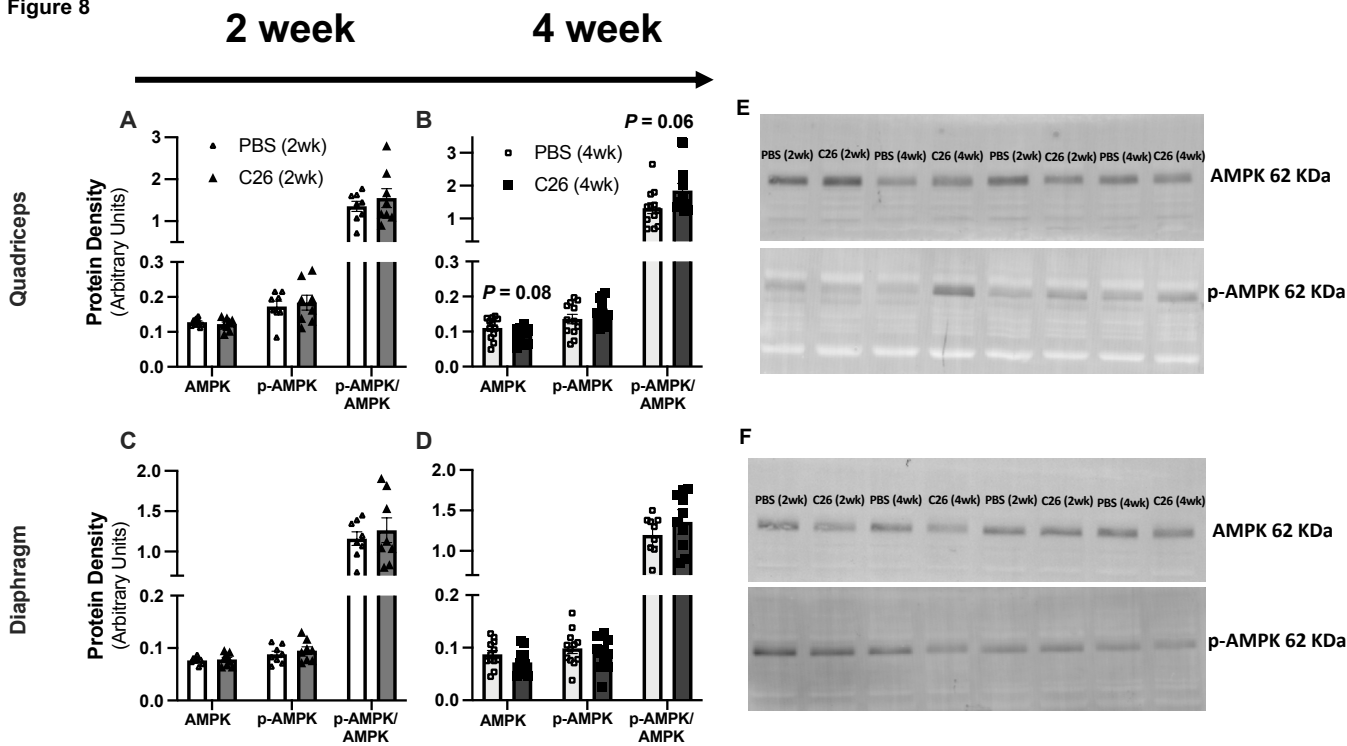



Figure 9

Complex I Stimulated  $H_2O_2$

Quadriceps

Diaphragm

2 week

4 week

2 week

4 week

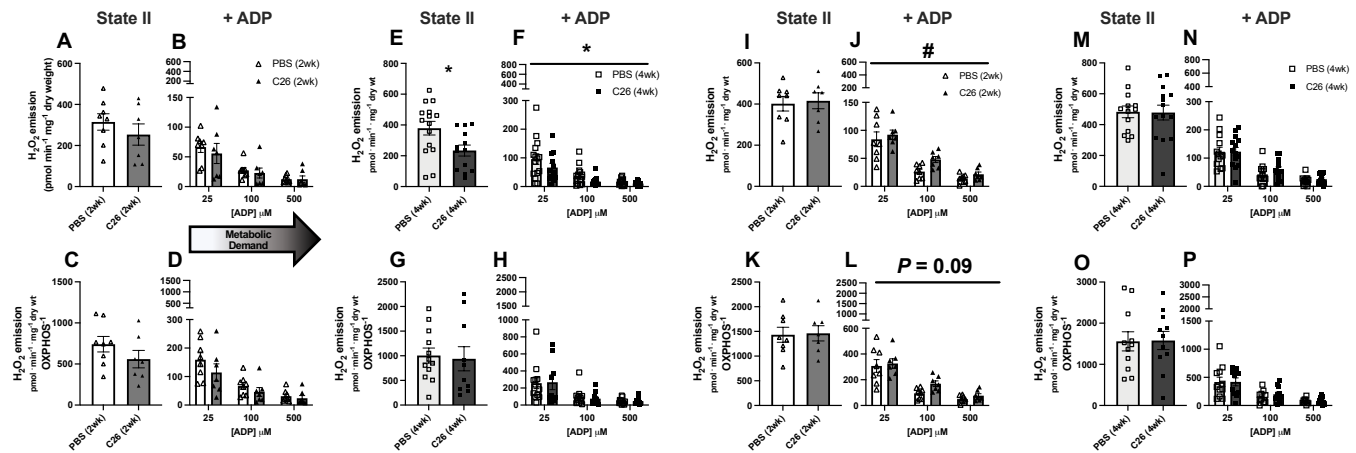

Figure 10

**QUADRICEPS**

2 WEEKS

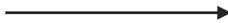

4 WEEKS

Fibre Area =

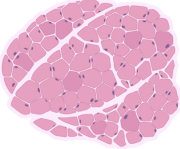

Force - Low

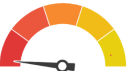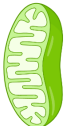

↓ Control by ADP  
= Cr Sensitivity  
= H<sub>2</sub>O<sub>2</sub>  
= Content

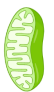

↑ Control by ADP  
↓ Cr Sensitivity  
= H<sub>2</sub>O<sub>2</sub>  
↓ Content

**Conclusion**

- Muscle weakness **PRECEDES** atrophy
- Early deficits in pyruvate-stimulated respiration **PRECEDE** atrophy
- Compensatory increases in pyruvate-stimulated respiration are coupled to **RESTORATION** of force in spite of atrophy
- **CREATINE INDEPENDENT** ATP synthesis up-regulates to a greater degree than the creatine dependent system

**DIAPHRAGM**

2 WEEKS

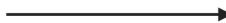

4 WEEKS

Fibre Area =

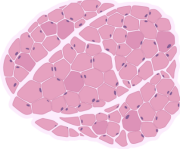

Force - Low

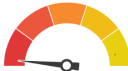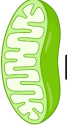

= Control by ADP  
= Cr Sensitivity  
↑ H<sub>2</sub>O<sub>2</sub>  
= Content

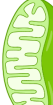

↑ Control by ADP  
= Cr Sensitivity  
= H<sub>2</sub>O<sub>2</sub>  
= Content

**Conclusion**

- Muscle weakness **PRECEDES** atrophy
- Early deficits in pyruvate-stimulated H<sub>2</sub>O<sub>2</sub> emission **PRECEDE** atrophy
- Compensatory increases in pyruvate-stimulated respiration occur despite **NO CHANGE** in force
- **BOTH** creatine dependent and independent ATP synthesis systems up-regulate to similar degrees
